# Supplementary material for: Absence of Kidney Tubular Injury in Patients With Acute Heart Failure With Acute Kidney Injury
Source: PubMed Central journal article supplement — Circ Heart Fail. 2024 Oct 18;17(11):e011751. doi: 10.1161/CIRCHEARTFAILURE.123.011751 (PMC11573103; doi:10.1161/circheartfailure.123.011751), 2024-10-18
Supplement: hhf-17-e011751-s001.pdf [file hhf-17-e011751-s001.pdf]

# SUPPLEMENTAL MATERIAL

## Supplemental Statistical Methods

Odds ratios were used for the primary analysis due to the ease of interpretability and a non-linear sensitivity analysis was also conducted. Non-linearity of biomarkers was assessed by fitting 3-4 restricted cubic splines, using the *rms* package in R, and the Wald test of the non-linear coefficient was also calculated. Biomarkers were considered non-linear if they had a significant p-value for the Wald test and the model fit was improved by a decrease in the Akaike information criterion (AIC) of  $>2$ . The Chi square statistic of the “pre-test” logistic regression clinical model, composed of the adjustment variables, was compared with the “post-test” clinical model after the addition of the biomarker of interest using the likelihood-ratio test. Localized non-parametric regression using the loess function from the *Hmisc* package in R was used to graphically represent estimated probabilities versus biomarker levels to assist in the interpretation of the non-linear relationships.

## Supplemental Figures

**Figure S1. Distribution of (A) plasma and (B) urinary biomarkers at the time of WRF stage 1-2 diagnosis within 72 hours of hospital admission stratified by progression to the primary composite outcome within 30 days.**

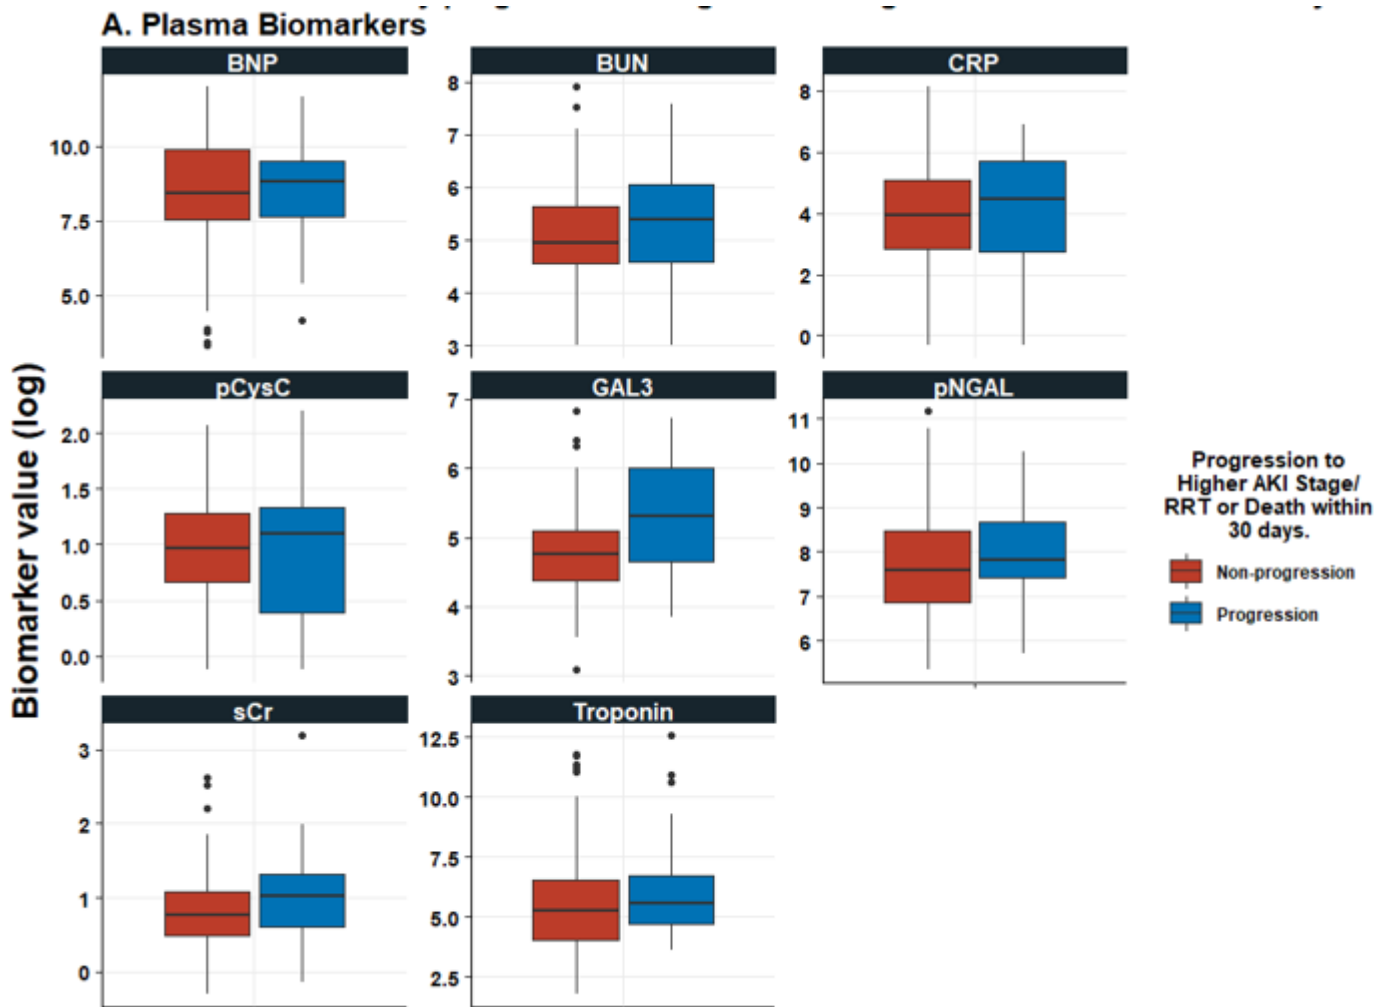

## B. Urinary Biomarkers

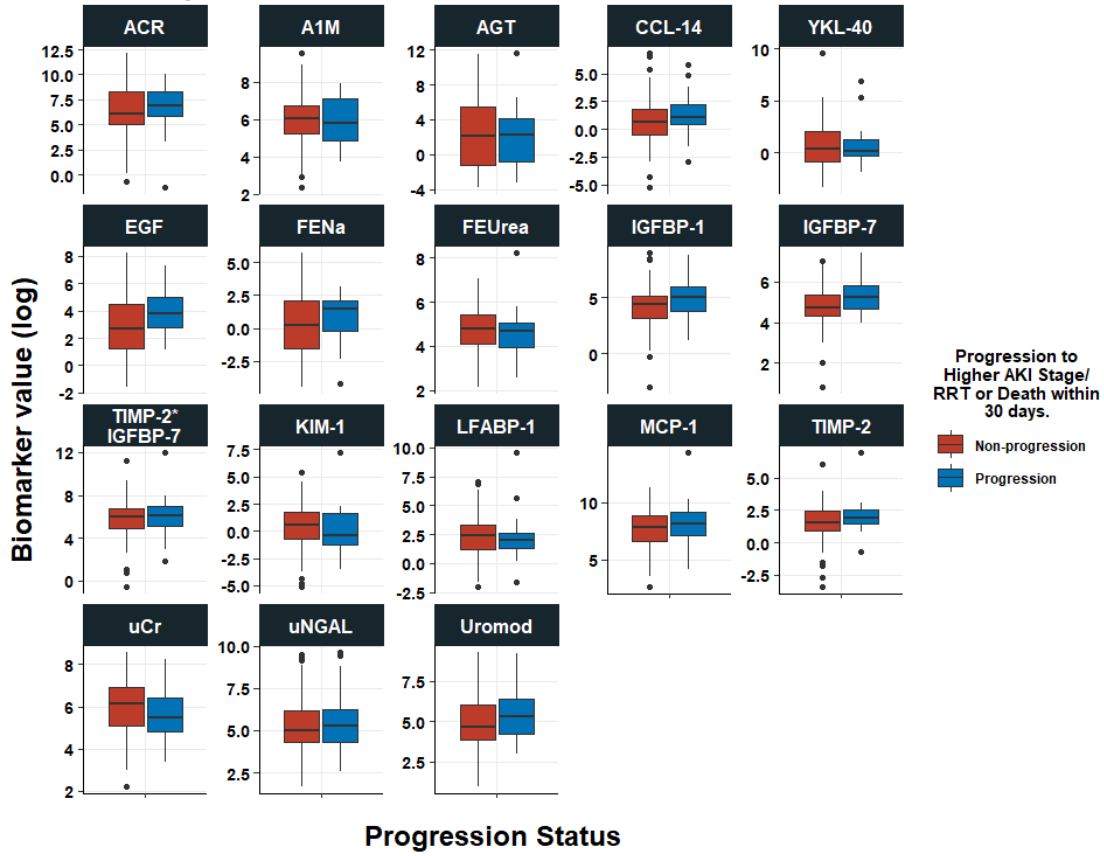

**Figure S2. Distribution of (A) plasma and (B) urinary biomarkers at the time of WRF stage 1-2 diagnosis within 72 hours of hospital admission stratified by progression to a higher WRF Stage or RRT within 30 days.**

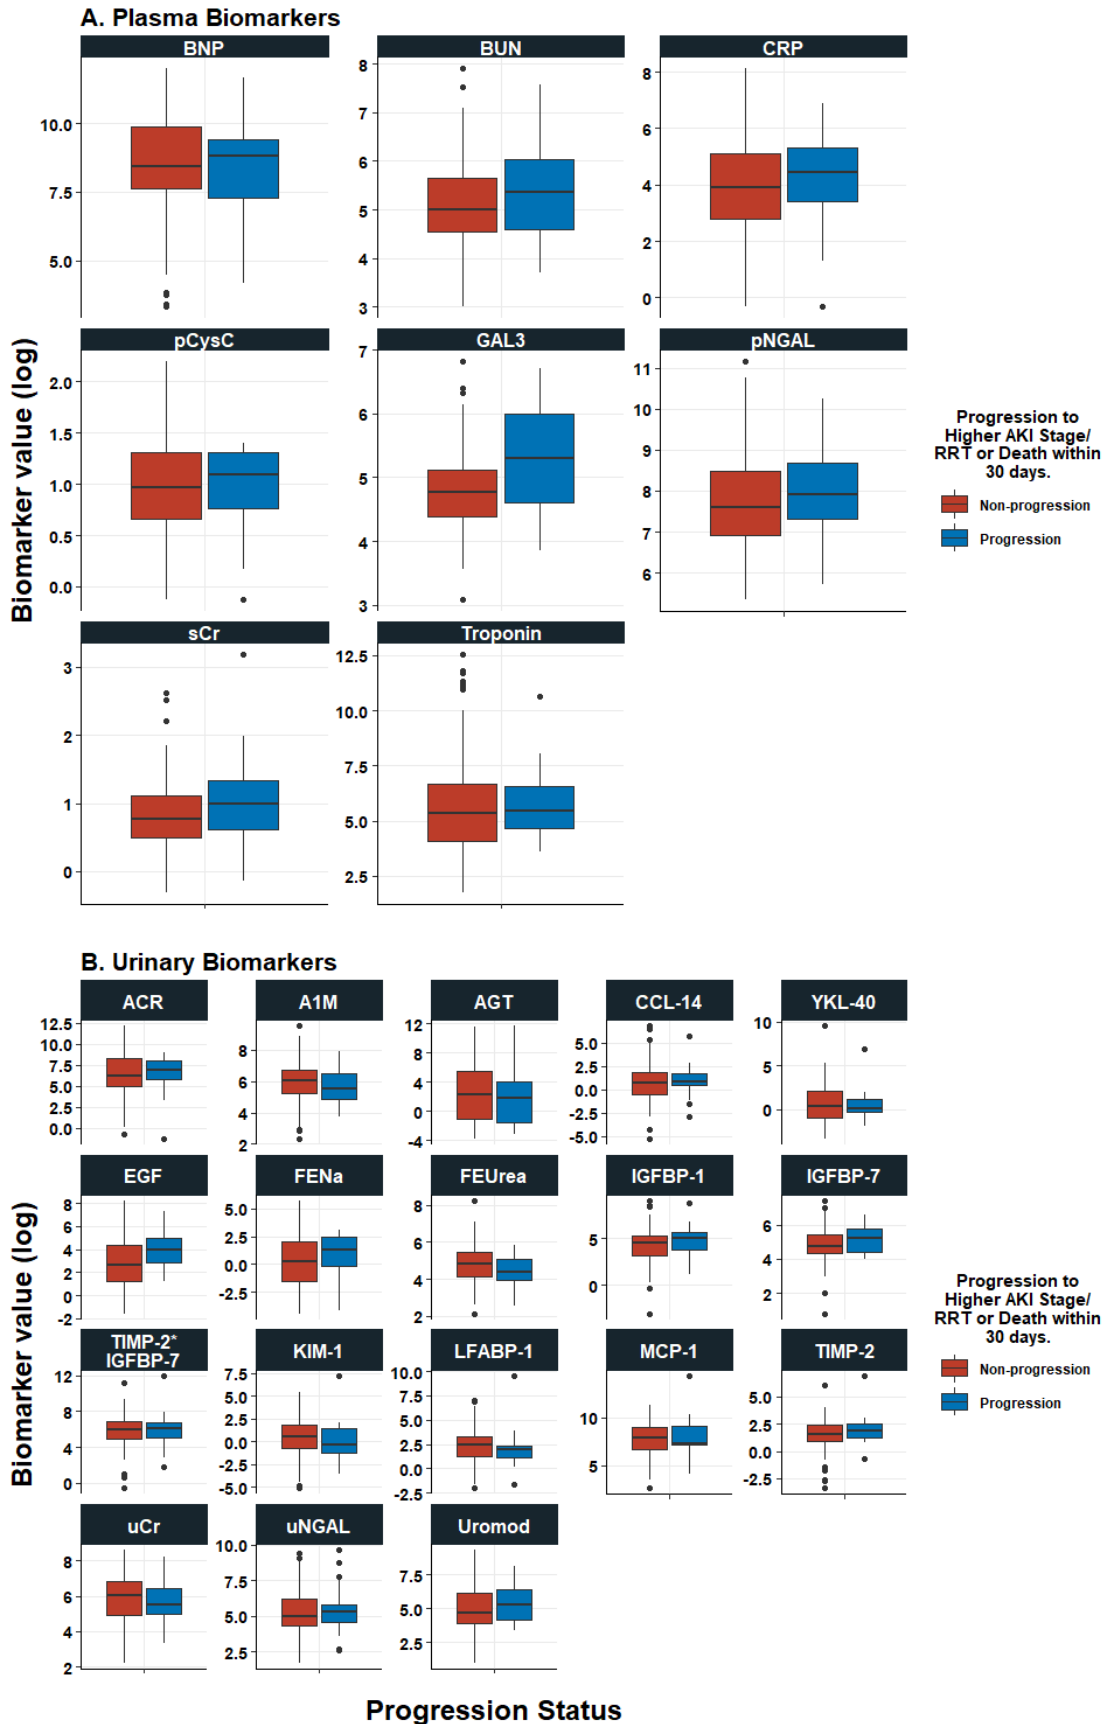

**Figure S3. Odds ratio of the highest biomarker tertile versus the lowest biomarker tertile for progression to higher stage of worsening renal function or renal replacement therapy within 30 days after adjusting for systolic blood pressure and BUN.**

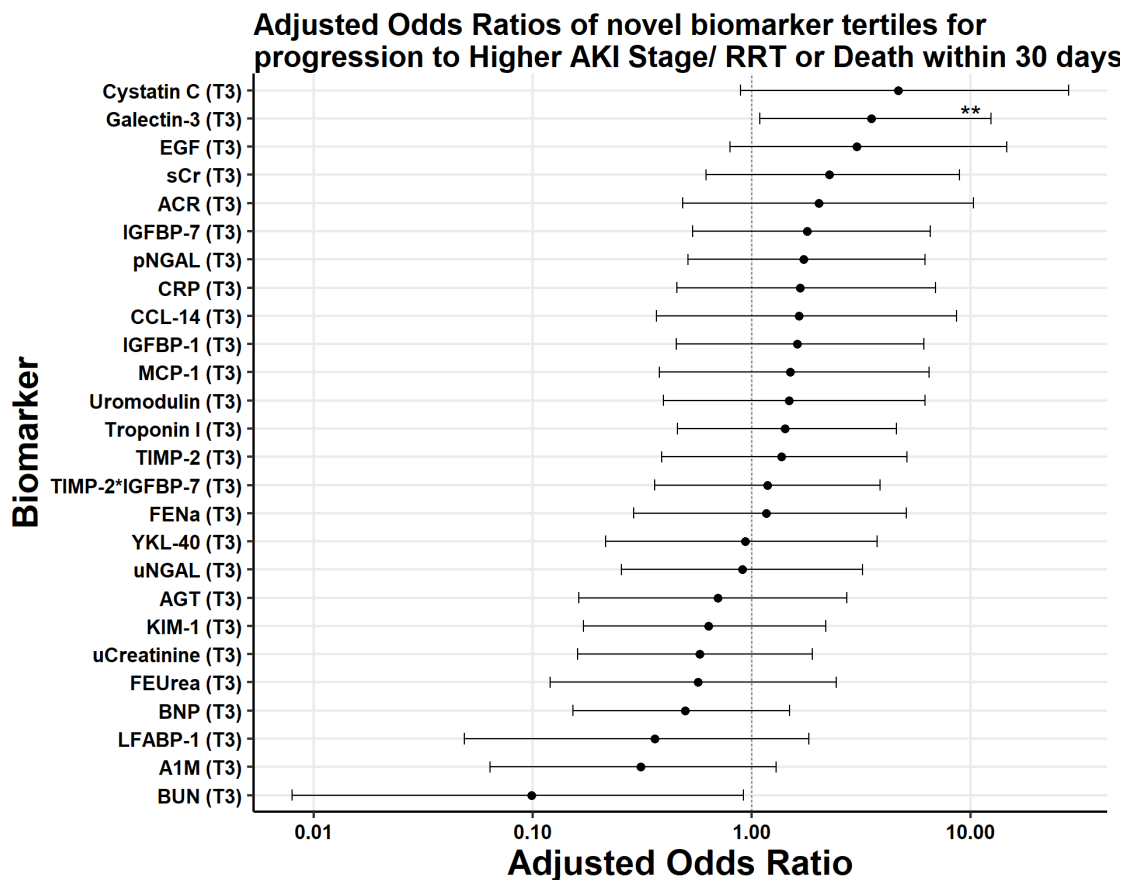

**Figure Legends**

**Figure S1**

Abbreviations: ACR, Albumin to creatinine ratio; A1M, alpha 1-microglobulin; uAGT, urinary angiotensinogen; BNP, brain natriuretic peptide; CCL-14, C-C motif chemokine ligand 14; CRP, C-reactive protein; IGFBP-1, EGF, Epidermal Growth Factor; FENa, Fractional Excretion of Sodium; FEUrea, Fractional Excretion of Urea; Insulin-like growth factor-binding protein 1; IGFBP-7, Insulin-like growth factor-binding protein 7; KIM-1, kidney injury molecule-1; L-FABP-1, liver-type fatty acid-binding protein-1; MCP-1, monocyte chemotactic protein-1; pNGAL, plasma neutrophil gelatinase-associated lipocalin; RRT, Renal Replacement Therapy; TIMP-2, tissue inhibitor of metalloproteinases-2; uNGAL, urinary neutrophil gelatinase-associated lipocalin; YKL-40, chitinase-3-like protein 1; uCr, urinary creatinine.

**Figure S2**

Abbreviations: ACR, Albumin to creatinine ratio; A1M, alpha 1-microglobulin; uAGT, urinary angiotensinogen; BNP, brain natriuretic peptide; CCL-14, C-C motif chemokine ligand 14; CRP, C-reactive protein; IGFBP-1, EGF, Epidermal Growth Factor; FENa, Fractional Excretion of Sodium; FEUrea, Fractional Excretion of Urea; Insulin-like growth factor-binding protein 1; IGFBP-7, Insulin-like growth

factor-binding protein 7; KIM-1, kidney injury molecule-1; L-FABP-1, liver-type fatty acid-binding protein-1; MCP-1, monocyte chemotactic protein-1; pNGAL, plasma neutrophil gelatinase-associated lipocalin; RRT, Renal Replacement Therapy; TIMP-2, tissue inhibitor of metalloproteinases-2; uNGAL, urinary neutrophil gelatinase-associated lipocalin; YKL-40, chitinase-3-like protein 1; uCreatinine, urinary creatinine.

### Figure S3

\*\* p-value <0.05

Abbreviations: A1M, alpha 1-microglobulin; ACR, Albumin to Creatinine Ratio; AGT, angiotensinogen; BNP, brain natriuretic peptide; CCL-14, chemokine ligand 14; CRP, C-reactive protein; EGF, epidermal growth factor; FeNa, fractional excretion of sodium; FeUrea, fractional excretion of urea; IGFBP-1, Insulin-like growth factor-binding protein 1; IGFBP-7, Insulin-like growth factor-binding protein 7; L-FABP-1, KIM-1, kidney injury molecule-1; LFABP-1, liver-type fatty acid-binding protein-1; MCP-1, monocyte chemotactic protein-1; pNGAL, plasma neutrophil gelatinase-associated lipocalin; sCreatinine, serum creatinine TIMP-2, tissue inhibitor of metalloproteinases-2; uNGAL, urine neutrophil gelatinase-associated lipocalin; YKL-40, chitinase-3-like protein 1; uCreatinine, urinary creatinine.

## Supplemental Tables

**Table S1. Percentage of specimens available on the day of AKI/WRF Diagnosis versus within 24 hours of criteria.**

| <b>Biomarker</b> | <b>Specimen on the Day Of AKI/WRF</b> | <b>Specimen Within 24 Hours of AKI/WRF</b> |
|------------------|---------------------------------------|--------------------------------------------|
| BNP              | 85.1%                                 | 14.9%                                      |
| hs-cTnI          | 81.1%                                 | 18.9%                                      |
| Galectin-3       | 85.7%                                 | 14.3%                                      |
| Plasma NGAL      | 85.7%                                 | 14.3%                                      |
| Urine NGAL       | 83.9%                                 | 16.1%                                      |
| KIM-1            | 89.9%                                 | 10.1%                                      |
| EGF              | 89.9%                                 | 10.1%                                      |
| Cystatin C       | 86.4%                                 | 13.4%                                      |
| CCL-14           | 89.9%                                 | 10.1%                                      |
| IGFBP-7          | 89.9%                                 | 10.1%                                      |
| IGFBP-1          | 89.9%                                 | 10.1%                                      |
| ACR              | 90.7%                                 | 9.3%                                       |
| AGT              | 89.2%                                 | 10.8%                                      |
| MCP-1            | 89.9%                                 | 10.1%                                      |
| TIMP-2           | 89.2%                                 | 10.8%                                      |
| A1M              | 89.9%                                 | 10.1%                                      |
| LFABP-1          | 89.2%                                 | 10.8%                                      |
| Uromodulin       | 89.9%                                 | 10.1%                                      |
| CRP              | 87.4%                                 | 12.6%                                      |
| YKL-40           | 89.9%                                 | 10.1%                                      |
| Urine Sodium     | 88.4%                                 | 11.6%                                      |
| Urine Urea       | 87.5%                                 | 12.4%                                      |

Abbreviations: AKI, acute kidney injury; ACR, Albumin to Creatinine Ratio; BNP, B-type natriuretic peptide; hs-cTnI, high-sensitivity cardiac troponin I; NGAL, neutrophil gelatinase-associated lipocalin; L-FABP-1, liver-type fatty acid-binding protein-1; KIM-1, kidney injury molecule-1; AGT, urinary angiotensinogen; A1M, alpha 1-microglobulin; YKL-40, chitinase-3-like protein 1; MCP-1, monocyte chemotactic protein-1; TIMP-2, tissue inhibitor of metalloproteinases-2; IGFBP-1, Insulin-like growth factor-binding protein 1; IGFBP-7, Insulin-like growth factor-binding protein 7; WRF, worsening renal function

**Table S2: Details of assay manufacturers, measurement range and accuracy.**

| Biomarker             | Assay Type | Sample Type | Manufacturer                          | Sensitivity* | Measurement Range         | Inter-assay CV | Intra-assay CV† |
|-----------------------|------------|-------------|---------------------------------------|--------------|---------------------------|----------------|-----------------|
| Galectin-3            | Architect  | Plasma      | Abbott Diagnostic, Wiesbaden, Germany | 1.0 ng/mL    | 5.5 to 103.1 ng/mL        | ≤ 4.8%         | ≤ 4.2%          |
| Cystatin C            | Architect  | Plasma      | Abbott Diagnostic, Wiesbaden, Germany | 0.031 mg/L   | 0.27-8.8 mg/L             | ≤ 3.54%        | ≤ 1.93%         |
| Galectin-3            | Architect  | Plasma      | Abbott Diagnostic, Wiesbaden, Germany | 1 ng/ml      | 5.5 to 103.1 ng/mL        | ≤ 4.2%         | ≤ 4.8%          |
| hs-cTnI               | Architect  | Plasma      | Abbott Diagnostic, Wiesbaden, Germany | 1.9 ng/L     | 2.7 to 3600.0 ng/L        | ≤ 3.9%         | ≤ 6.2%          |
| BNP                   | Architect  | Plasma      | Abbott Diagnostic, Wiesbaden, Germany | 10 ng/L      | 10 to 5000 pg/mL          | ≤ 6.7%         | ≤ 5.6%          |
| CRP                   | Architect  | Plasma      | Abbott Diagnostic, Wiesbaden, Germany | 0.2 mg/L     | 0.2 – 320 mg/L            | ≤ 1.4%         | ≤ 2.1%          |
| Sodium                | Architect  | Plasma      | Abbott Diagnostic, Wiesbaden, Germany | 0.53 mmol/l  | 115 - 164 mmol/l          | ≤ 1.6%         | ≤ 1.6%          |
| Urea                  | Architect  | Plasma      | Abbott Diagnostic, Wiesbaden, Germany | 0.25 mmol/L  | 0.5 - 46 mmol/l           | ≤ 3%           | ≤ 3%            |
| Sodium                | Architect  | Urine       | Abbott Diagnostic, Wiesbaden, Germany | 0.48 mmol/l  | 2 - 275 mmol/l            | ≤ 1.6%         | ≤ 1.6%          |
| Urea                  | Architect  | Urine       | Abbott Diagnostic, Wiesbaden, Germany | 5.4 mmol/L   | 0.8 - 35.5 mmol/l         | ≤ 3%           | ≤ 3%            |
| Albumin               | Architect  | Urine       | Abbott Diagnostic, Wiesbaden, Germany | 0.3 g/dL     | 0.3 – 9.4 g/dL            | ≤ 1.5%         | ≤ 1.3%          |
| pNGAL                 | Alere      | Plasma      | Alere Inc, San Diego, California      | 0.7 ng/ml    | 15-1300 ng/mL             | ≤ 2.1%         | ≤ 2.1%          |
| uNGAL                 | Architect  | Urine       | Abbott Diagnostic, Wiesbaden, Germany | ≤ 1 ng/ml    | 10 - 6000 ng/mL           | ≤ 6.7%         | ≤ 5.2%          |
| <b>ELISA Assays</b>   |            |             |                                       |              |                           |                |                 |
| LFABP-1               | ELISA      | Urine       | CMIC Holdings Ltd., Tokyo, Japan      | 0.3 ng/mL    | 0.3 - 60 ng/mL            | ≤ 4.1%         | <15%            |
| Angiotensinogen       | ELISA      | Urine       | IBL Co., Ltd., Fujioka-Shi, Japan     | 0.03 ng/mL   | 0.31 - 20 ng/mL           | ≤ 5.8%         | ≤ 5.5%          |
| TIMP-2                | ELISA      | Urine       | R&D Systems (Minneapolis, MN, USA)    | 0.011 ng/mL  | 2.61-6.33 µg/g creatinine | ≤ 7.8%         | ≤ 6.5%          |
| Uromodulin            | ELISA      | Urine       | MD Bioproducts, Zurich, Switzerland   | < 1 ng/mL    | 2.3 ng/ml - 150 ng/ml     | ≤ 12.9%        | ≤ 8.8%          |
| EGF                   | ELISA      | Urine       | R&D Systems (Minneapolis, MN, USA)    | 0.7 pg/mL    | 3.9 - 250 pg/mL           | ≤ 6%           | ≤ 4.5%          |
| CCL-14                | ELISA      | Urine       | Thermo Fisher, Waltham, MA, USA       | 7 pg/mL      | 6.14-1500 pg/mL           | <12%           | <10%            |
| <b>Luminex Assays</b> |            |             |                                       |              |                           |                |                 |
| A1M                   | Luminex    | Urine       | R&D Systems (Minneapolis, MN, USA)    | 29563 pg/mL  | 147,826 - 35,921,60 pg/mL | <25%           | ≤ 17.6%         |
| MCP-1                 | Luminex    | Urine       | R&D Systems (Minneapolis, MN, USA)    | 9.9 pg/mL    | 33-8,017 pg/mL            | <25%           | ≤ 6.3%          |
| YKL-40                | Luminex    | Urine       | R&D Systems (Minneapolis, MN, USA)    | 3.3 pg/mL    | 352 - 85,610 pg/mL        | <25%           | ≤ 3.9%          |
| IGFBP-1               | Luminex    | Urine       | R&D Systems (Minneapolis, MN, USA)    | 42.6 pg/mL   | 139 - 33,690 pg/mL        | <25%           | ≤ 5.3%          |
| IGFBP-7               | Luminex    | Urine       | R&D Systems (Minneapolis, MN, USA)    | 118 pg/mL    | 385 - 93,600 pg/mL        | <25%           | ≤ 5%            |
| KIM-1                 | Luminex    | Urine       | R&D Systems (Minneapolis, MN, USA)    | 17.3 pg/mL   | 100 - 24,370 pg/mL        | <25%           | ≤ 12%           |

\*For the Architect and Alere assays, the Limit of Detection is provided as a measure of the assay sensitivity; †Intra-assay CV values are provided from the manufacturer except for the Luminex assays where the analysed intra-assay values are provided. The manufacturer advises that the maximum intra-assay CV is <20% but real world values are typically much lower.

Abbreviations: CV, Coefficient of Variation; NA, not applicable; BNP, brain natriuretic peptide; uCr, urinary creatinine; pNGAL, plasma neutrophil gelatinase associated lipocalin; uNGAL, urinary neutrophil gelatinase associated lipocalin; L-FABP-1, liver-type fatty acid binding protein-1; KIM-1, kidney injury molecule-1; KIM-1, kidney injury molecule 1; uAGT, urinary angiotensinogen; A1M, alpha 1-microglobulin; YKL-40, chitinase-3-like protein 1; MCP-1, monocyte chemotactic protein-1; TIMP-2, tissue inhibitor of metalloproteinases-2; IGFBP-1, Insulin-like growth factor-binding protein 1; IGFBP-7, Insulin-like growth factor-binding protein 7; ACR, Albumin to creatinine ratio; pCysC, plasma Cystatin C; CRP, C-reactive protein; EGF, Epidermal Growth Factor; CCL-14, C-C motif chemokine ligand 14

**Table S3. Admission Characteristics for patients with Stage 1-2 WRF within 72 hours of admission stratified by progression to higher WRF Stage or RRT within 30 days.**

| <b>n</b><br>n                                   | <b>N</b> | <b>Non-progressor</b><br>151 | <b>Progressor</b><br>24 | <b>p-value</b> |
|-------------------------------------------------|----------|------------------------------|-------------------------|----------------|
| Age (mean (SD))                                 | 175      | 69.5 (12.7)                  | 69.3 (18.7)             | 0.934          |
| Male (%)                                        | 175      | 97 (64.2)                    | 11 (45.8)               | 0.113          |
| Black ethnicity (%)                             | 175      | 49 (32.5)                    | 10 (41.7)               | 0.486          |
| Heart rate, beats/min (mean (SD))               | 175      | 87.4 (21.8)                  | 91.1 (16.8)             | 0.427          |
| Systolic blood pressure, mm Hg (mean (SD))      | 175      | 145.8 (30.7)                 | 139.5 (33.0)            | 0.358          |
| Diastolic blood pressure, mm Hg (mean (SD))     | 175      | 81.8 (22.3)                  | 80.9 (22.0)             | 0.850          |
| Coronary artery disease (%)                     | 175      | 83 (55.0)                    | 13 (54.2)               | 1.00           |
| Hypertension (%)                                | 175      | 128 (84.8)                   | 20 (83.3)               | 0.769          |
| Cerebrovascular accident (%)                    | 175      | 24 (15.9)                    | 2 (8.3)                 | 0.537          |
| Peripheral arterial disease (%)                 | 175      | 3 (2.0)                      | 0 (0.0)                 | 1.000          |
| COPD (%)                                        | 175      | 34 (22.5)                    | 8 (33.3)                | 0.303          |
| Chronic kidney disease (%)                      | 175      | 43 (28.5)                    | 12 (50.0)               | 0.056          |
| Tobacco use (%)                                 | 175      | 24 (15.9)                    | 2 (8.3)                 | 0.537          |
| Diabetes (%)                                    | 175      | 83 (55.0)                    | 12 (50.0)               | 0.666          |
| Hyperlipidemia (%)                              | 175      | 86 (57.0)                    | 14 (58.3)               | 1.000          |
| Beta-blockers (%)                               | 175      | 114 (75.5)                   | 15 (62.5)               | 0.213          |
| ACE inhibitors (%)                              | 175      | 67 (44.4)                    | 10 (41.7)               | 0.829          |
| Diuretics (%)                                   | 175      | 94 (62.3)                    | 18 (75.0)               | 0.260          |
| Angiotensin-receptor blockers (%)               | 175      | 29 (19.2)                    | 7 (29.2)                | 0.281          |
| Antiarrhythmic agent (%)                        | 175      | 22 (14.6)                    | 5 (20.8)                | 0.541          |
| Hemoglobin, g/dl (median [IQR])                 | 175      | 11.2 [9.3, 13.1]             | 10.5 [9.1, 11.7]        | 0.196          |
| BUN, mg/dl (median [IQR])                       | 175      | 25.0 [18.6, 40.8]            | 24.5 [19.1, 53.2]       | 0.714          |
| Sodium, mmol/l (median [IQR])                   | 175      | 139.0 [136.0, 142.0]         | 139.0 [136.0, 140.2]    | 0.241          |
| eGFR, ml/min/1.73 m <sup>2</sup> (median [IQR]) | 175      | 50.8 [37.6, 69.2]            | 48.1 [30.9, 68.0]       | 0.564          |

ACE, angiotensin converting enzyme; CABG, coronary artery bypass graft; COPD, chronic obstructive pulmonary disease; eGFR, estimated glomerular filtration rate; IQR, inter-quartile range; PCI, Percutaneous coronary intervention; SD, standard deviation



**Table S4 Median, First and Third Quartile Values for Progressors versus Non-Progressors to the Primary Composite Outcome Measured at Time of Worsening Renal Function in Acute Heart Failure Hospitalization**

| Biomarker                                                                                                                                                                                                                                                                                                                                                                                                                                                                                                                                                                                                                                                                                   | Non-progressor<br>n=143 | Progressor<br>n=143  | p-value          |
|---------------------------------------------------------------------------------------------------------------------------------------------------------------------------------------------------------------------------------------------------------------------------------------------------------------------------------------------------------------------------------------------------------------------------------------------------------------------------------------------------------------------------------------------------------------------------------------------------------------------------------------------------------------------------------------------|-------------------------|----------------------|------------------|
| <b>Serum/Plasma Biomarkers</b>                                                                                                                                                                                                                                                                                                                                                                                                                                                                                                                                                                                                                                                              |                         |                      |                  |
| Galectin-3 (ng/ml) (median [IQR])                                                                                                                                                                                                                                                                                                                                                                                                                                                                                                                                                                                                                                                           | 26.9 [20.6, 34.0]       | 39.5 [25.0, 63.7]    | <b>&lt;0.001</b> |
| NGAL (ng/ml) (median [IQR])                                                                                                                                                                                                                                                                                                                                                                                                                                                                                                                                                                                                                                                                 | 194.0 [117.7, 358.8]    | 227.3 [173.5, 409.5] | 0.095            |
| Creatinine (mg/dL) (median [IQR])                                                                                                                                                                                                                                                                                                                                                                                                                                                                                                                                                                                                                                                           | 1.7 [1.4, 2.1]          | 2.0 [1.5, 2.5]       | 0.106            |
| Troponin I (ng/mL) (median [IQR])                                                                                                                                                                                                                                                                                                                                                                                                                                                                                                                                                                                                                                                           | 38.7 [16.6, 91.7]       | 48.2 [25.9, 107.9]   | 0.112            |
| BUN (mg/dL) (median [IQR])                                                                                                                                                                                                                                                                                                                                                                                                                                                                                                                                                                                                                                                                  | 31.0 [23.4, 49.8]       | 41.9 [24.0, 66.0]    | 0.281            |
| CRP (mg/L) (median [IQR])                                                                                                                                                                                                                                                                                                                                                                                                                                                                                                                                                                                                                                                                   | 15.0 [7.2, 33.8]        | 21.8 [6.6, 51.9]     | 0.467            |
| BNP (pg/ml) (median [IQR])                                                                                                                                                                                                                                                                                                                                                                                                                                                                                                                                                                                                                                                                  | 338.2 [188.7, 957.1]    | 447.1 [198.8, 724.6] | 0.808            |
| Cystatin C (mg/L) (median [IQR])                                                                                                                                                                                                                                                                                                                                                                                                                                                                                                                                                                                                                                                            | 1.9 [1.6, 2.4]          | 2.1 [1.3, 2.5]       | 0.974            |
| <b>Urinary biomarkers</b>                                                                                                                                                                                                                                                                                                                                                                                                                                                                                                                                                                                                                                                                   |                         |                      |                  |
| EGF (ug/g Cr) (median [IQR])                                                                                                                                                                                                                                                                                                                                                                                                                                                                                                                                                                                                                                                                | 6.6 [2.3, 19.6]         | 14.2 [6.7, 31.9]     | <b>0.049</b>     |
| Creatinine (mg/dL) (median [IQR])                                                                                                                                                                                                                                                                                                                                                                                                                                                                                                                                                                                                                                                           | 68.1 [35.1, 115.8]      | 44.6 [28.4, 84.8]    | 0.102            |
| IGFBP-7 (ug/g Cr) (median [IQR])                                                                                                                                                                                                                                                                                                                                                                                                                                                                                                                                                                                                                                                            | 27.5 [20.0, 43.4]       | 37.9 [25.7, 55.1]    | 0.141            |
| Uromodulin (mg/g Cr) (median [IQR])                                                                                                                                                                                                                                                                                                                                                                                                                                                                                                                                                                                                                                                         | 25.9 [14.7, 64.7]       | 39.0 [18.3, 84.4]    | 0.160            |
| TIMP-2 (ug/g Cr) (median [IQR])                                                                                                                                                                                                                                                                                                                                                                                                                                                                                                                                                                                                                                                             | 3.0 [1.9, 5.4]          | 3.8 [2.8, 5.8]       | 0.206            |
| CCL-14 (ug/g Cr) (median [IQR])                                                                                                                                                                                                                                                                                                                                                                                                                                                                                                                                                                                                                                                             | 1.6 [0.7, 3.3]          | 2.2 [1.4, 4.6]       | 0.208            |
| KIM-1 (ug/g Cr) (median [IQR])                                                                                                                                                                                                                                                                                                                                                                                                                                                                                                                                                                                                                                                              | 1.5 [0.6, 3.3]          | 0.8 [0.4, 3.1]       | 0.212            |
| IGFBP-1 (ug/g Cr) (median [IQR])                                                                                                                                                                                                                                                                                                                                                                                                                                                                                                                                                                                                                                                            | 21.0 [8.7, 36.3]        | 33.5 [13.3, 63.0]    | 0.23             |
| FENa (median [IQR])                                                                                                                                                                                                                                                                                                                                                                                                                                                                                                                                                                                                                                                                         | 1.1 [0.3, 4.2]          | 2.7 [0.8, 4.8]       | 0.234            |
| MCP-1 (ng/g Cr) (median [IQR])                                                                                                                                                                                                                                                                                                                                                                                                                                                                                                                                                                                                                                                              | 225.8 [106.7, 467.1]    | 286.2 [141.2, 558.1] | 0.362            |
| ACR (mg/g Cr) (median [IQR])                                                                                                                                                                                                                                                                                                                                                                                                                                                                                                                                                                                                                                                                | 69.8 [32.1, 217.3]      | 118.8 [58.3, 328.9]  | 0.363            |
| LFABP-1 (ug/g Cr) (median [IQR])                                                                                                                                                                                                                                                                                                                                                                                                                                                                                                                                                                                                                                                            | 5.3 [2.2, 9.5]          | 4.0 [2.5, 6.0]       | 0.469            |
| NGAL (ug/g Cr) (median [IQR])                                                                                                                                                                                                                                                                                                                                                                                                                                                                                                                                                                                                                                                               | 30.9 [19.2, 74.2]       | 38.8 [19.9, 75.1]    | 0.521            |
| FEUrea (median [IQR])                                                                                                                                                                                                                                                                                                                                                                                                                                                                                                                                                                                                                                                                       | 28.0 [17.3, 42.6]       | 27.0 [16.5, 34.0]    | 0.55             |
| AGT (ug/g Cr) (median [IQR])                                                                                                                                                                                                                                                                                                                                                                                                                                                                                                                                                                                                                                                                | 4.7 [0.4, 40.1]         | 4.8 [0.5, 16.9]      | 0.764            |
| A1M (mg/g Cr) (median [IQR])                                                                                                                                                                                                                                                                                                                                                                                                                                                                                                                                                                                                                                                                | 63.7 [35.0, 103.7]      | 54.0 [28.7, 135.7]   | 0.773            |
| TIMP-2*IGFBP-7 (ng/ml <sup>2</sup> /1000/g Cr) (median [IQR])                                                                                                                                                                                                                                                                                                                                                                                                                                                                                                                                                                                                                               | 65.1 [32.2, 108.9]      | 68.6 [33.4, 124.4]   | 0.832            |
| YKL-40 (ug/g Cr) (median [IQR])                                                                                                                                                                                                                                                                                                                                                                                                                                                                                                                                                                                                                                                             | 1.3 [0.5, 3.9]          | 1.2 [0.8, 2.4]       | 0.837            |
| ACR, Albumin to creatinine ratio; AGT, urinary angiotensinogen; A1M, alpha 1-microglobulin; BNP, brain natriuretic peptide; CCL-14, C-C motif chemokine ligand 14; Cr, creatinine; CRP, C-reactive protein; EGF, Epidermal Growth Factor; IQR, inter-quartile range; FENa, Fractional Excretion of Sodium; IGFBP-1, Insulin-like growth factor-binding protein 1; IGFBP-7, Insulin-like growth factor-binding protein 7; KIM-1, Kidney injury molecule 1; L-FABP-1, liver-type fatty acid binding protein-1; MCP-1, monocyte chemotactic protein-1; NGAL, neutrophil gelatinase associated lipocalin; TIMP-2, tissue inhibitor of metalloproteinases-2; YKL-40, chitinase-3-like protein 1. |                         |                      |                  |

**Table S5. Median, First and Third Quartile Values for Progressors versus Non-Progressors to the Secondary Outcome of Renal Replacement Therapy or Higher Stage of Worsening Renal Function Measured at Time of Worsening Renal Function in Acute Heart Failure Hospitalization**

| Variable                                                      | Non-progressor<br>n=151 | Progressor<br>n=24   | p-value      |
|---------------------------------------------------------------|-------------------------|----------------------|--------------|
| <b>Serum/Plasma Biomarkers</b>                                |                         |                      |              |
| Galectin-3 (ng/ml) (median [IQR])                             | 27.2 [20.9, 34.5]       | 39.4 [24.4, 63.7]    | <b>0.011</b> |
| Creatinine (mg/dL) (median [IQR])                             | 1.7 [1.4, 2.2]          | 2.0 [1.5, 2.5]       | 0.188        |
| BUN (mg/dL) (median [IQR])                                    | 32.0 [23.4, 50.5]       | 41.4 [24.0, 66.0]    | 0.414        |
| NGAL (ng/ml) (median [IQR])                                   | 194.0 [121.0, 358.8]    | 242.5 [158.8, 409.5] | 0.215        |
| BNP (pg/ml) (median [IQR])                                    | 346.9 [199.7, 946.1]    | 447.1 [159.8, 673.7] | 0.69         |
| Troponin I (ng/mL) (median [IQR])                             | 40.5 [17.1, 100.8]      | 43.7 [25.3, 94.3]    | 0.76         |
| Cystatin C (mg/L) (median [IQR])                              | 1.9 [1.6, 2.5]          | 2.1 [1.7, 2.5]       | 0.977        |
| CRP (mg/L) (median [IQR])                                     | 15.0 [6.9, 34.6]        | 21.8 [11.3, 40.7]    | 0.497        |
| <b>Urinary biomarkers</b>                                     |                         |                      |              |
| EGF (ug/g Cr) (median [IQR])                                  | 6.6 [2.4, 18.3]         | 15.9 [7.0, 32.1]     | <b>0.044</b> |
| NGAL (ug/g Cr) (median [IQR])                                 | 30.9 [19.1, 75.7]       | 40.4 [23.7, 55.6]    | 0.59         |
| AIM (mg/g Cr) (median [IQR])                                  | 65.8 [35.0, 104.9]      | 45.8 [28.7, 90.5]    | 0.407        |
| AGT (ug/g Cr) (median [IQR])                                  | 5.3 [0.5, 40.1]         | 3.4 [0.3, 16.9]      | 0.508        |
| YKL-40 (ug/g Cr) (median [IQR])                               | 1.3 [0.5, 3.9]          | 1.1 [0.8, 2.4]       | 0.985        |
| IGFBP-1 (ug/g Cr) (median [IQR])                              | 21.4 [8.7, 38.0]        | 33.5 [13.3, 50.4]    | 0.437        |
| IGFBP-7 (ug/g Cr) (median [IQR])                              | 27.8 [20.3, 43.8]       | 37.9 [21.4, 55.1]    | 0.319        |
| TIMP-2*IGFBP-7 (ng/ml <sup>2</sup> /1000/g Cr) (median [IQR]) | 65.1 [32.2, 120.8]      | 68.6 [33.4, 111.9]   | 0.817        |
| TIMP-2 (ug/g Cr) (median [IQR])                               | 3.0 [2.0, 5.5]          | 3.8 [2.4, 5.5]       | 0.378        |
| KIM-1 (ug/g Cr) (median [IQR])                                | 1.5 [0.6, 3.5]          | 0.8 [0.4, 2.8]       | 0.192        |
| LFABP-1 (ug/g Cr) (median [IQR])                              | 5.3 [2.2, 9.5]          | 3.8 [2.1, 4.9]       | 0.25         |
| MCP-1 (ng/g Cr) (median [IQR])                                | 244.0 [107.8, 506.0]    | 158.7 [139.1, 542.4] | 0.792        |
| Uromodulin (mg/g Cr) (median [IQR])                           | 27.3 [14.7, 67.4]       | 39.0 [18.3, 83.0]    | 0.322        |
| CCL-14 (ug/g Cr) (median [IQR])                               | 1.6 [0.7, 3.5]          | 1.9 [1.4, 3.4]       | 0.621        |
| FENa (median [IQR])                                           | 1.2 [0.4, 4.1]          | 2.2 [0.8, 5.6]       | 0.343        |
| FEUrea (median [IQR])                                         | 28.1 [18.0, 42.6]       | 22.2 [14.9, 34.0]    | 0.225        |
| Creatinine (mg/dL) (median [IQR])                             | 64.6 [31.9, 113.6]      | 44.9 [31.4, 84.8]    | 0.474        |
| ACR (mg/g Cr) (median [IQR])                                  | 70.7 [32.1, 282.9]      | 118.8 [58.3, 259.4]  | 0.602        |

IQR, inter-quartile range; Abbreviations: NA, not applicable; BNP, brain natriuretic peptide; pNGAL, plasma neutrophil gelatinase associated lipocalin; sCr, serum creatinine; uNGAL, urinary neutrophil gelatinase associated lipocalin; AIM, alpha-1 microglobulin; L-FABP-1, liver-type fatty acid binding protein-1; KIM-1, kidney injury molecule-1; KIM-1, kidney injury molecule 1; AGT, urinary angiotensinogen; AIM, alpha 1-microglobulin; YKL-40, chitinase-3-like protein 1; MCP-1, monocyte chemotactic protein-1; TIMP-2, tissue inhibitor of metalloproteinases-2; IGFBP-1, Insulin-like growth factor-binding protein 1; IGFBP-7, Insulin-like growth factor-binding protein 7; EGF, Epidermal Growth Factor; CCL-14, C-C motif chemokine ligand 14; FENa, Fractional Excretion of Sodium; FEUrea, Fractional Urea; ACR, Albumin to creatinine ratio; CRP, C-reactive protein  
Biomarkers were compared using the Wilcoxon signed-rank test

**Table S6. Odds of progression to a higher stage of worsening renal function or renal replacement therapy within 30 days in the highest tertile of biomarkers versus lowest tertile of biomarkers in unadjusted and adjusted logistic regression in individuals with stage 1 or 2 acute kidney injury in AKINESIS**

| <b>Plasma Biomarkers<br/>(Tertile 3 versus Tertile 1)</b> | <b>Unadjusted<br/>OR (95% CI)</b> | <b>p-value</b> | <b>Adjusted*<br/>OR (95% CI)</b> | <b>p-value</b> |
|-----------------------------------------------------------|-----------------------------------|----------------|----------------------------------|----------------|
| <b>Galectin-3</b>                                         | <b>3.5 (1.3-10.6)</b>             | <b>0.018</b>   | <b>3.5 (1.1-12.4)</b>            | <b>0.041</b>   |
| Urea                                                      | 1.1 (0.4-3.0)                     | 0.875          | 0.1 (0.0-0.9)                    | 0.053          |
| Cystatin C                                                | 1.9 (0.5-8.1)                     | 0.337          | 4.7 (0.9-28)                     | 0.076          |
| Creatinine                                                | 2.5 (0.9-7.7)                     | 0.099          | 2.3 (0.6-8.9)                    | 0.223          |
| NGAL                                                      | 2.1 (0.7-6.5)                     | 0.195          | 1.7 (0.5-6.2)                    | 0.387          |
| BNP                                                       | 0.6 (0.2-1.7)                     | 0.338          | 0.5 (0.2-1.5)                    | 0.221          |
| CRP                                                       | 1.7 (0.5-7.2)                     | 0.403          | 1.7 (0.5-6.9)                    | 0.450          |
| Troponin I                                                | 1.4 (0.5-4.6)                     | 0.547          | 1.4 (0.5-4.6)                    | 0.549          |
| <b>Urine Biomarkers<br/>(Tertile 3 versus Tertile 1)</b>  | <b>Unadjusted<br/>OR (95% CI)</b> | <b>p-value</b> | <b>Adjusted*<br/>OR (95% CI)</b> | <b>p-value</b> |
| EGF                                                       | 3.7 (1-17.5)                      | 0.065          | 3 (0.8-14.7)                     | 0.126          |
| AIM                                                       | 0.6 (0.1-2)                       | 0.400          | 0.3 (0.1-1.3)                    | 0.122          |
| LFABP-1                                                   | 0.4 (0.1-1.8)                     | 0.253          | 0.4 (0.0-1.8)                    | 0.246          |
| IGFBP-7                                                   | 2.1 (0.7-7.4)                     | 0.218          | 1.8 (0.5-6.5)                    | 0.349          |
| ACR                                                       | 2.3 (0.6-11.7)                    | 0.252          | 2 (0.5-10.3)                     | 0.349          |
| Creatinine                                                | 0.5 (0.2-1.7)                     | 0.29           | 0.6 (0.2-1.9)                    | 0.376          |
| IGFBP-1                                                   | 2.0 (0.6-7.0)                     | 0.271          | 1.6 (0.5-6.1)                    | 0.466          |
| KIM-1                                                     | 0.6 (0.2-2.0)                     | 0.444          | 0.6 (0.2-2.2)                    | 0.475          |
| CCL-14                                                    | 1.9 (0.4-9.9)                     | 0.391          | 1.6 (0.4-8.6)                    | 0.522          |
| MCP-1                                                     | 1.8 (0.5-7.4)                     | 0.397          | 1.5 (0.4-6.4)                    | 0.564          |
| Uromodulin                                                | 1.8 (0.5-7.5)                     | 0.360          | 1.5 (0.4-6.2)                    | 0.567          |
| AGT                                                       | 0.7 (0.2-2.5)                     | 0.552          | 0.7 (0.2-2.7)                    | 0.609          |
| TIMP-2                                                    | 1.6 (0.5-5.8)                     | 0.460          | 1.4 (0.4-5.1)                    | 0.626          |
| TIMP-2*IGFBP-7                                            | 1.2 (0.4-3.8)                     | 0.765          | 1.2 (0.4-3.9)                    | 0.780          |
| uNGAL                                                     | 1.1 (0.3-3.9)                     | 0.823          | 0.9 (0.3-3.2)                    | 0.879          |
| YKL-40                                                    | 0.7 (0.2-2.6)                     | 0.603          | 0.9 (0.2-3.7)                    | 0.923          |
| <b>Ratios<br/>(Tertile 3 versus Tertile 1)</b>            | <b>Unadjusted<br/>OR (95% CI)</b> | <b>p-value</b> | <b>Adjusted*<br/>OR (95% CI)</b> | <b>p-value</b> |
| FEUrea                                                    | 0.5 (0.1-1.7)                     | 0.264          | 0.6 (0.1-2.4)                    | 0.450          |
| FENa                                                      | 1.5 (0.4-6.3)                     | 0.554          | 1.2 (0.3-5.1)                    | 0.828          |

\*Adjusted for systolic blood pressure and BUN at the time of AKI diagnosis

AIM, alpha 1-microglobulin; AGT, angiotensinogen; BNP, brain natriuretic peptide; CCL-14, chemokine ligand 14; CI, confidence interval; CRP, C-reactive protein; EGF, epidermal growth factor; FeNa, fractional excretion of sodium; FeUrea, fractional excretion of urea; IGFBP-1, Insulin-like growth factor-binding protein 1; IGFBP-7, Insulin-like growth factor-binding protein 7; L-FABP-1, KIM-1, kidney injury molecule-1; LFABP-1, liver-type fatty acid-binding protein-1; MCP-1, monocyte chemotactic protein-1; NGAL, neutrophil gelatinase-associated lipocalin; OR, odds ratio; TIMP-2, tissue inhibitor of metalloproteinases-2; YKL-40, chitinase-3-like protein 1

**Table S7. Category-free net reclassification index and integrated discrimination index for the prediction of progression from Stage 1-2 WRF within 72 hours of hospital admission to higher WRF stage, RRT or death within 30 days.**

| Biomarker          | cfNRI<br>(95% CI) | P            | cfNRI <sub>ev</sub><br>(95% CI) | P <sub>ev</sub> | cfNRI <sub>ne</sub><br>(95% CI) | P <sub>ne</sub>  | IDI<br>(95% CI)   | P <sub>IDI</sub> |
|--------------------|-------------------|--------------|---------------------------------|-----------------|---------------------------------|------------------|-------------------|------------------|
| Galectin-3         | 0.52 (0.14-0.89)  | <b>0.007</b> | 0.19 (-0.15-0.53)               | 0.28            | 0.33 (0.17-0.48)                | <b>&lt;0.001</b> | 0.1 (0.04-0.16)   | <b>0.002</b>     |
| Troponin I         | 0.21 (-0.17-0.59) | 0.278        | -0.06 (-0.41-0.28)              | 0.723           | 0.27 (0.12-0.43)                | <b>&lt;0.001</b> | 0.02 (0-0.04)     | 0.108            |
| TIMP-2             | 0.28 (-0.18-0.75) | 0.227        | 0.05 (-0.38-0.47)               | 0.827           | 0.24 (0.06-0.41)                | <b>0.008</b>     | 0.02 (-0.01-0.05) | 0.21             |
| CCL-14             | 0.05 (-0.41-0.52) | 0.819        | -0.05 (-0.47-0.38)              | 0.827           | 0.1 (-0.08-0.28)                | 0.267            | 0.01 (0-0.03)     | 0.165            |
| uCreatinine        | 0.46 (0.08-0.83)  | <b>0.016</b> | 0.33 (0-0.67)                   | 0.053           | 0.12 (-0.04-0.29)               | 0.131            | 0.01 (0-0.02)     | 0.255            |
| Uromodulin         | 0.22 (-0.25-0.68) | 0.358        | 0.05 (-0.38-0.47)               | 0.827           | 0.17 (-0.01-0.35)               | 0.062            | 0.01 (-0.02-0.04) | 0.36             |
| IGFBP-7            | 0.25 (-0.21-0.71) | 0.287        | 0.05 (-0.38-0.47)               | 0.827           | 0.2 (0.03-0.38)                 | <b>0.024</b>     | 0.01 (-0.01-0.04) | 0.337            |
| IGFBP-1            | 0.13 (-0.33-0.6)  | 0.576        | 0.05 (-0.38-0.47)               | 0.827           | 0.08 (-0.1-0.26)                | 0.356            | 0.01 (-0.01-0.03) | 0.288            |
| EGF                | 0.28 (-0.18-0.74) | 0.235        | 0.14 (-0.28-0.57)               | 0.508           | 0.14 (-0.04-0.31)               | 0.137            | 0.01 (-0.01-0.03) | 0.413            |
| TIMP-2*<br>IGFBP-7 | 0.03 (-0.43-0.49) | 0.897        | 0.05 (-0.38-0.47)               | 0.827           | -0.02 (-0.2-0.16)               | 0.854            | 0.01 (-0.01-0.02) | 0.322            |
| MCP-1              | 0.02 (-0.44-0.48) | 0.932        | -0.05 (-0.47-0.38)              | 0.827           | 0.07 (-0.11-0.25)               | 0.46             | 0.01 (-0.01-0.02) | 0.437            |
| CRP                | 0.21 (-0.26-0.68) | 0.382        | 0.2 (-0.23-0.63)                | 0.361           | 0.01 (-0.18-0.2)                | 0.923            | 0 (0-0.01)        | 0.719            |
| BNP                | 0.08 (-0.31-0.46) | 0.694        | 0 (-0.35-0.35)                  | 1               | 0.08 (-0.09-0.24)               | 0.356            | 0 (0-0)           | 0.853            |
| uNGAL              | 0.02 (-0.38-0.41) | 0.934        | -0.07 (-0.42-0.29)              | 0.714           | 0.08 (-0.08-0.25)               | 0.316            | 0 (0-0)           | 0.703            |
| AGT                | 0.05 (-0.42-0.51) | 0.841        | 0.05 (-0.38-0.47)               | 0.827           | 0 (-0.18-0.18)                  | 1                | 0 (0-0)           | 0.892            |
| LFABP-1            | 0.39 (-0.03-0.82) | 0.07         | 0.43 (0.04-0.82)                | <b>0.03</b>     | -0.03 (-0.21-0.15)              | 0.713            | 0 (0-0)           | 0.998            |
| FEUrea             | 0.19 (-0.28-0.66) | 0.429        | 0.26 (-0.17-0.7)                | 0.234           | -0.07 (-0.26-0.11)              | 0.444            | 0 (0-0)           | 0.897            |
| ACR                | 0.27 (-0.21-0.75) | 0.277        | 0.16 (-0.29-0.6)                | 0.486           | 0.11 (-0.08-0.29)               | 0.25             | 0 (0-0)           | 0.753            |
| Cystatin C         | 0.28 (-0.18-0.75) | 0.235        | 0.2 (-0.23-0.63)                | 0.361           | 0.08 (-0.1-0.27)                | 0.383            | 0 (0-0)           | 0.771            |
| YKL-40             | 0.01 (-0.45-0.47) | 0.967        | -0.14 (-0.57-0.28)              | 0.508           | 0.15 (-0.03-0.33)               | 0.094            | 0 (-0.01-0.02)    | 0.622            |
| KIM-1              | 0.31 (-0.15-0.77) | 0.182        | 0.14 (-0.28-0.57)               | 0.508           | 0.17 (-0.01-0.35)               | 0.062            | 0 (-0.01-0.02)    | 0.741            |
| A1M                | 0.42 (-0.02-0.86) | 0.063        | 0.33 (-0.07-0.74)               | 0.105           | 0.08 (-0.1-0.26)                | 0.356            | 0 (-0.01-0.01)    | 0.358            |
| FENa               | 0.25 (-0.23-0.73) | 0.311        | 0.16 (-0.29-0.6)                | 0.486           | 0.09 (-0.1-0.28)                | 0.338            | 0 (-0.01-0.01)    | 0.734            |
| pNGAL              | 0.16 (-0.22-0.54) | 0.41         | 0.12 (-0.22-0.47)               | 0.476           | 0.03 (-0.13-0.2)                | 0.676            | 0 (-0.01-0)       | 0.857            |

P, P-Value; cfNRI, category-free NRI; cfNRI<sub>ev</sub>, cfNRI for events; cfNRI<sub>ne</sub>, cfNRI for non-events; IDI, Integrated Discrimination Improvement; Abbreviations: NA, not applicable; BNP, brain natriuretic peptide; uCr, urinary creatinine; pNGAL, plasma neutrophil gelatinase associated lipocalin; uNGAL, urinary neutrophil gelatinase associated lipocalin; L-FABP-1, liver-type fatty acid binding protein-1; KIM-1, kidney injury molecule-1; KIM-1, kidney injury molecule 1; uAGT, urinary angiotensinogen; A1M, alpha 1-microglobulin; YKL-40, chitinase-3-like protein 1; MCP-1, monocyte chemotactic protein-1; TIMP-2, tissue inhibitor of metalloproteinases-2; IGFBP-1, Insulin-like growth factor-binding protein 1; IGFBP-7, Insulin-like growth factor-binding protein 7; ACR, Albumin to creatinine ratio; uNa, urinary Sodium; urUrea, urinary Urea; pCysC, plasma Cystatin C; CRP, C-reactive protein; FENa, Fractional Excretion of Sodium; EGF, Epidermal Growth Factor; CCL-14, C-C motif chemokine ligand 14
